# Supplementary material for: Effect of varying pH on solution interactions of soluble meat proteins with different plant proteins
Source: Royal Society of Chemistry journal article supplement (doi:10.1039/d1fo02411f), 2021-12-01
Supplement: d1fo02411f1.pdf [file d1fo02411f1.pdf]

## Supporting Data

Table S1. Mean Particle diameter ( $d_{4,3}$ ) of the different solutions and blends at different pHs

| Protein              | Significance<br>between<br>batches <sup>1</sup> | Mean particle diameter $d_{4,3}$ ( $\mu\text{m}$ ) |                         |                          |
|----------------------|-------------------------------------------------|----------------------------------------------------|-------------------------|--------------------------|
|                      |                                                 | pH 4.5                                             | pH 5.3                  | pH 7                     |
| Pork sws             | A                                               | 61.6 ± 4.3                                         | 43.2 ± 2.5              | 21.3 ± 9.8               |
| Pork ws              | A                                               | 61.2 ± 2.8                                         | 40.6 ± 13.6             | 44.3 ± 17.7              |
| Potato               | B                                               | 13.3 ± 0.5                                         | 17.0 ± 0.8              | 19.6 ± 1.8               |
| Potato + sws         | A                                               | 38.1 ± 8.8                                         | 45.4 ± 6.4              | 23.9 ± 3.8               |
| Potato + ws          | A                                               | 50.1 ± 2.8                                         | 24.4 ± 0.7              | 22.2 ± 0.1               |
| Canola               | C                                               | 12.4 ± 4.4                                         | 10.5 ± 3.8 <sup>2</sup> | 29.6 ± 11.9 <sup>2</sup> |
| Canola + sws         | A                                               | 34.8 ± 2.6                                         | 24.3 ± 1.0              | 28.9 ± 2.1               |
| Canola + ws          | A                                               | 51.2 ± 1.8                                         | 48.2 ± 1.0              | 33.9 ± 5.8               |
| Sunflower            | D                                               | 16.3 ± 10.0                                        | 17.6 ± 0.7              | 28.9 ± 0.5               |
| Sunflower + sws      | A                                               | 33.1 ± 2.6                                         | 33.9 ± 24.8             | 25.7 ± 0.6               |
| Sunflower + ws       | A                                               | 48.9 ± 1.1                                         | 26.2 ± 0.8              | 29.3 ± 1.1               |
| Wheat                | A                                               | 41.2 ± 14.5                                        | 24.9 ± 4.4              | 260.6 ± 68.6             |
| Wheat + sws          | A                                               | 62.2 ± 1.8                                         | 29.6 ± 8.7              | 165.2 ± 57.1             |
| Wheat + ws           | A                                               | 31.4 ± 3.7                                         | 64.0 ± 9.7              | 69.9 ± 1.8               |
| Pumpkin              | E                                               | 2.8 ± 2.4                                          | 6.6 ± 0.5               | 4.5 ± 2.4                |
| Pumpkin + sws        | A                                               | 70.0 ± 1.0                                         | 17.1 ± 1.5              | 66.9 ± 22.0              |
| Pumpkin + ws         | A                                               | 55.0 ± 21.2                                        | 47.0 ± 29.0             | 124.0 ± 87.4             |
|                      | pH 4.5                                          |                                                    | p < 0.05                | ns <sup>3</sup>          |
|                      | pH 5.3                                          | p < 0.05                                           |                         | p < 0.05                 |
|                      | pH 7.0                                          | ns <sup>3</sup>                                    | p < 0.05                |                          |
| Pork or Mixtures sws | ws                                              | ns <sup>3</sup>                                    |                         |                          |

<sup>1</sup> Different letter indicates significant difference within the column (p < 0.05)

<sup>2</sup> Determination by using dynamic light scattering (z-average value · 10<sup>-3</sup>  $\mu\text{m}$ )

<sup>3</sup> ns: not significant (p > 0.05)

Meat proteins

4.5

5.3

7

Sws

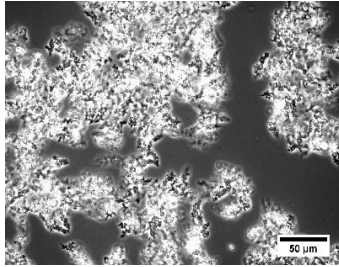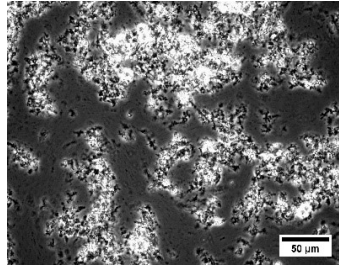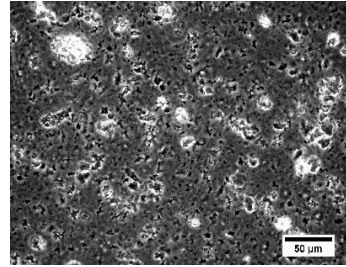

Ws

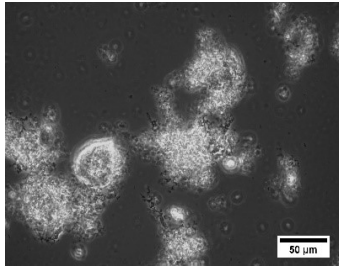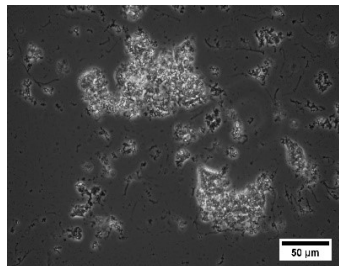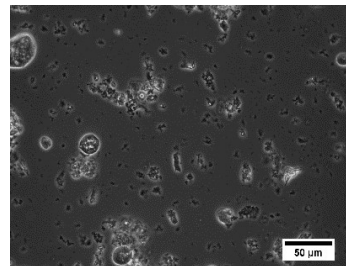

Sws heated

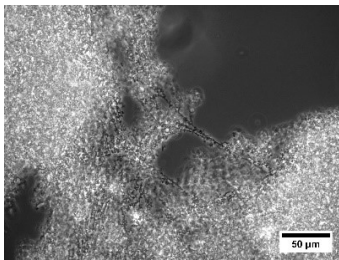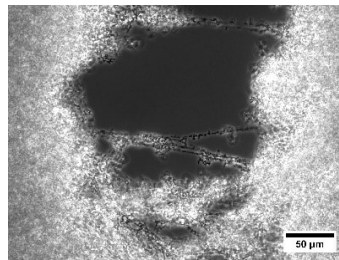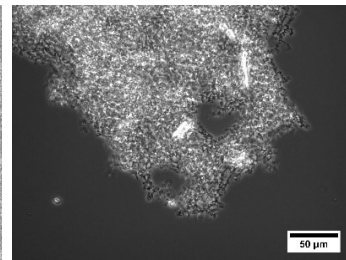

Ws

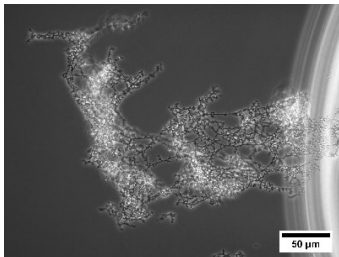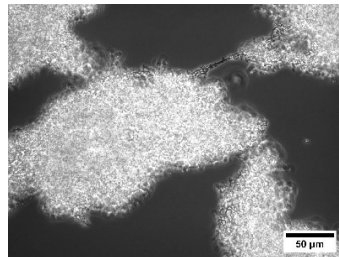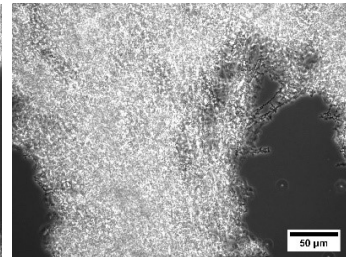

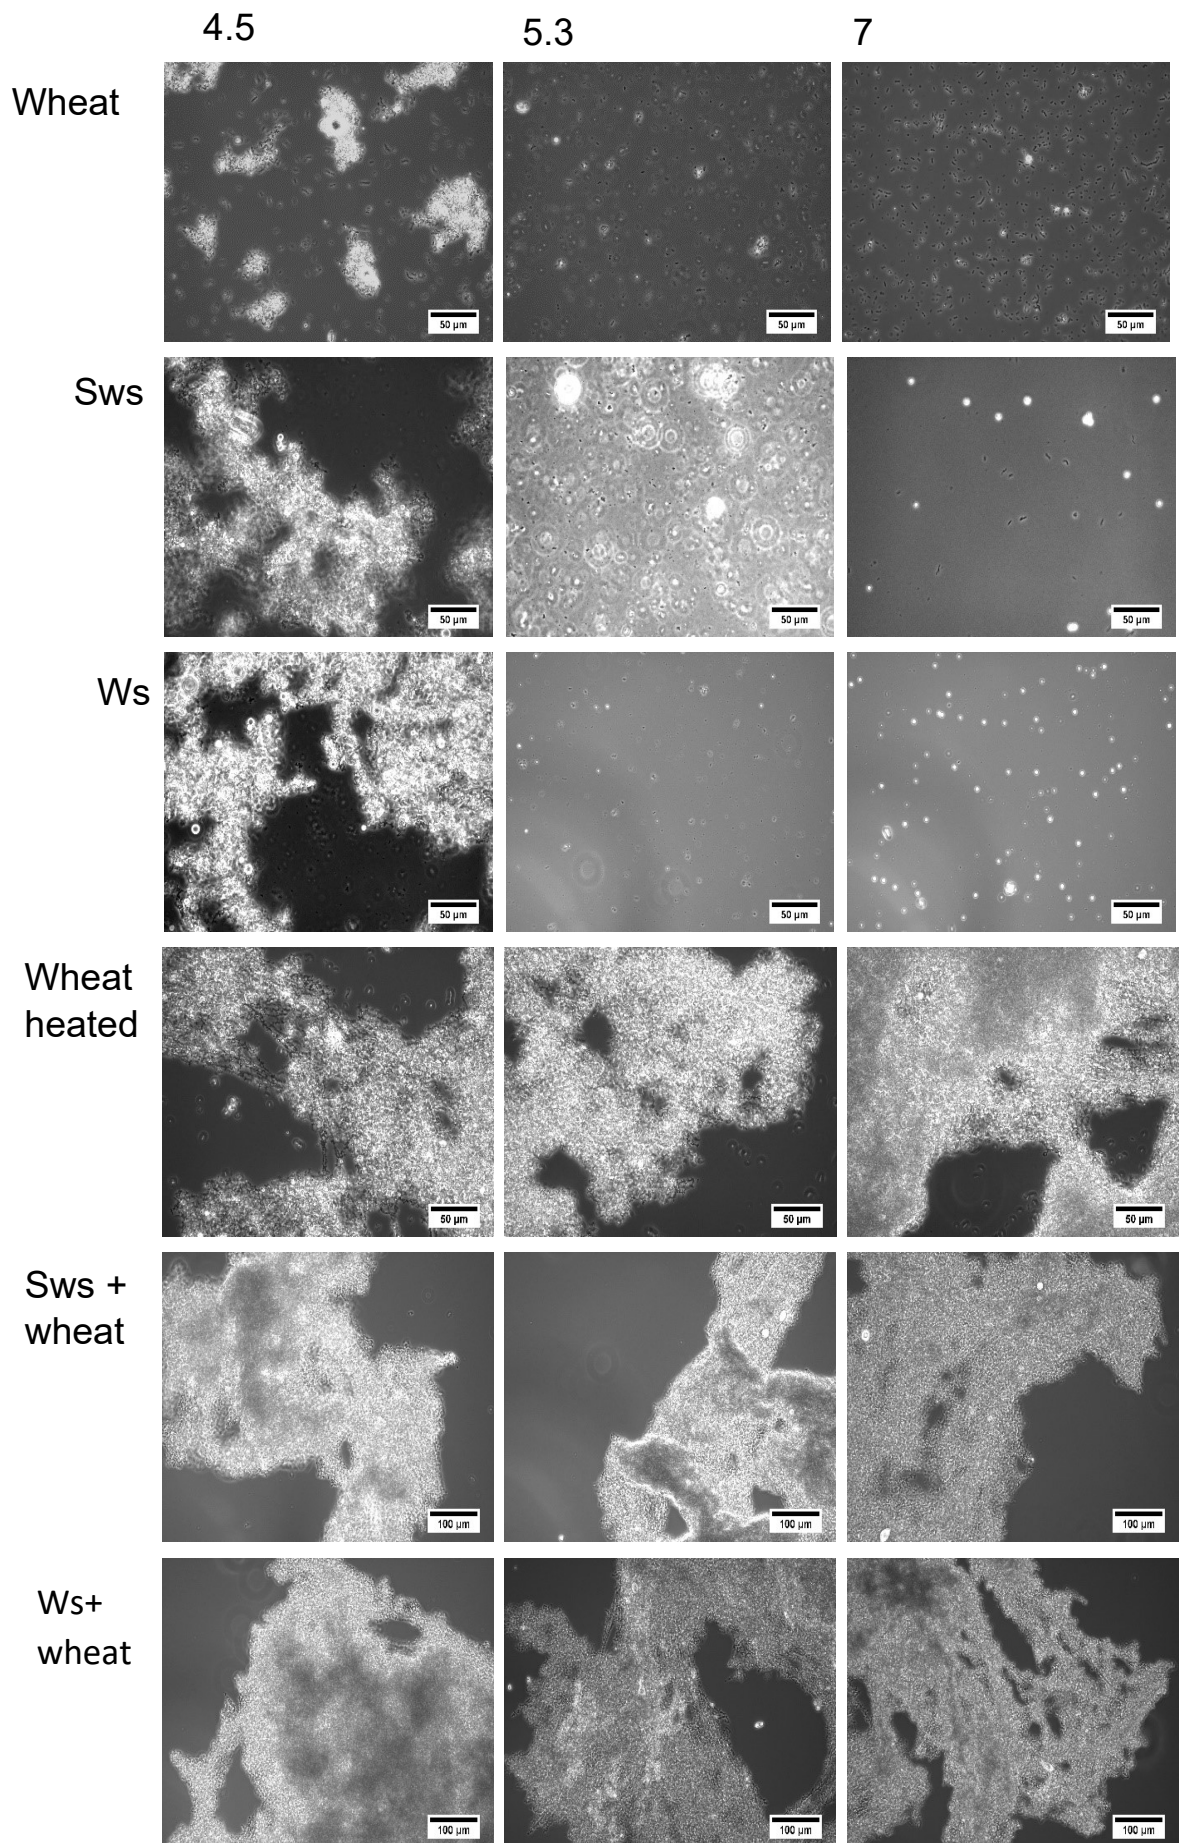

4.5

5.3

7

Sun-flower

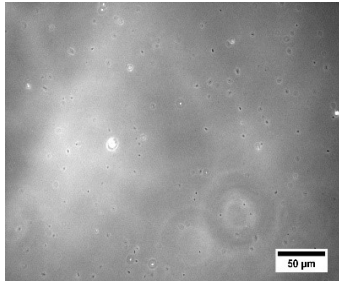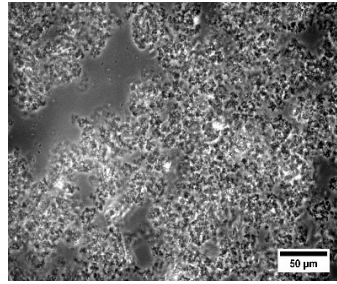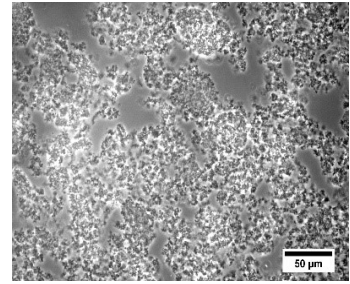

Sws

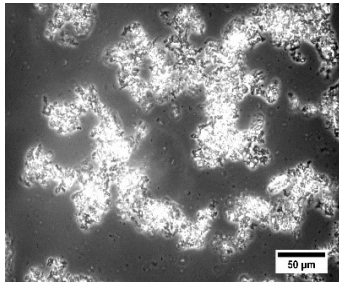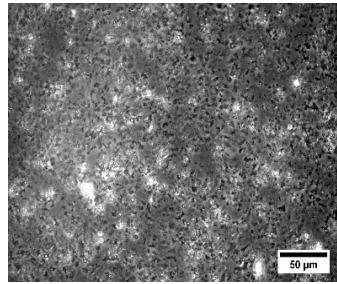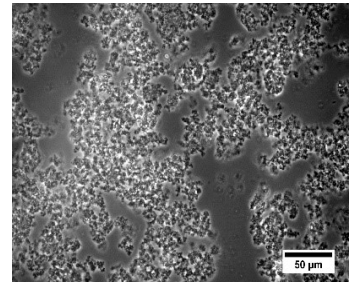

Ws

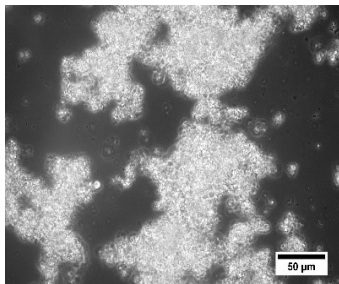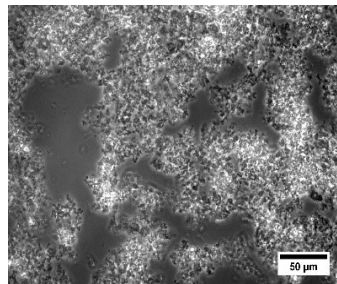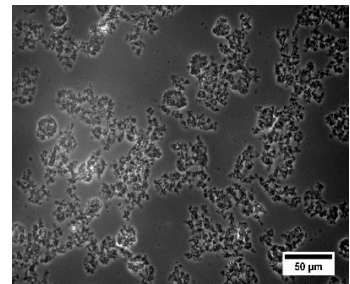

Sun-flower heated

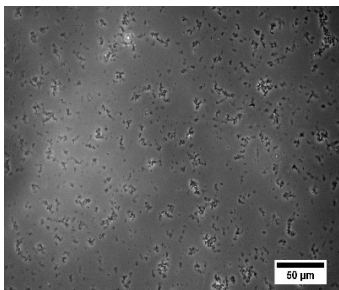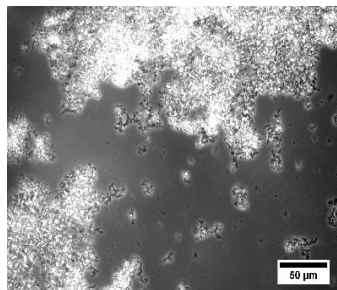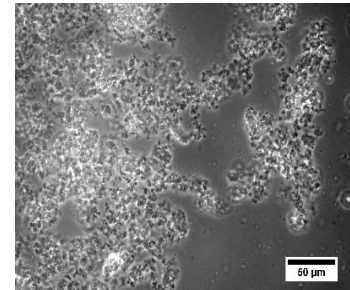

Sws

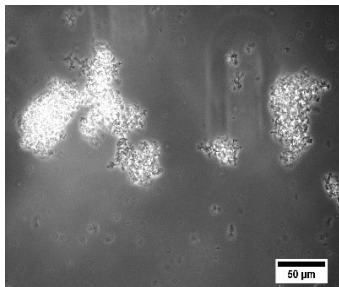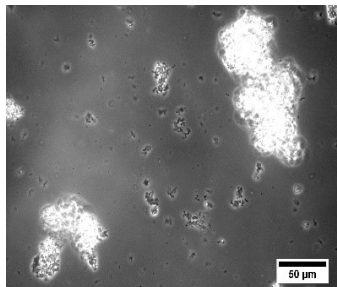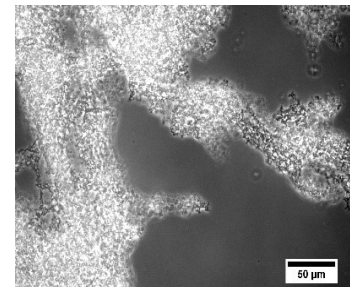

Ws

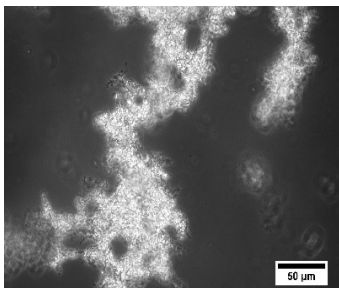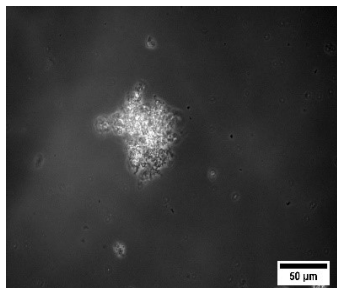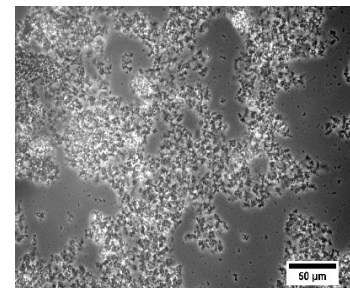

4.5

5.3

7

Canola

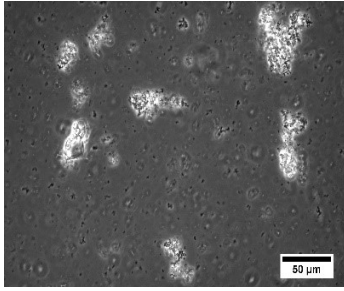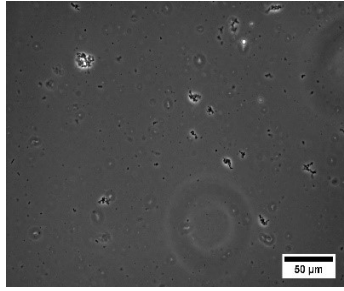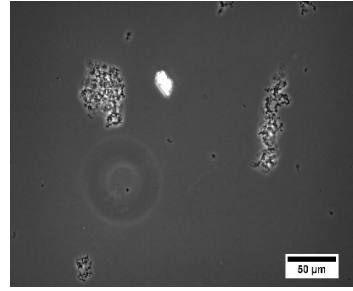

Sws

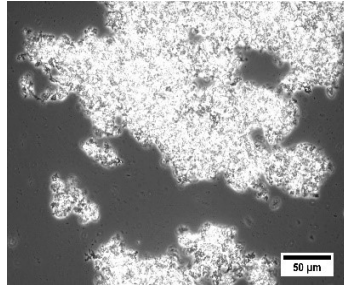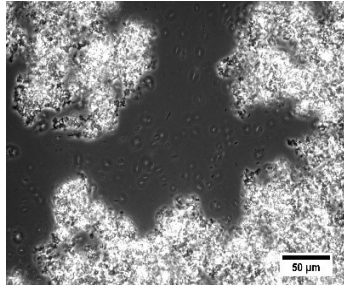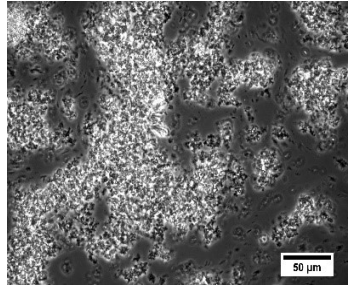

Ws

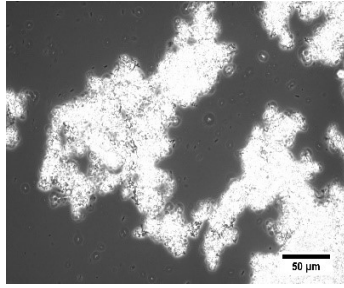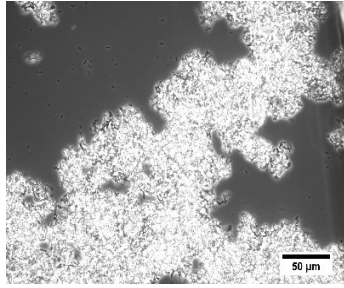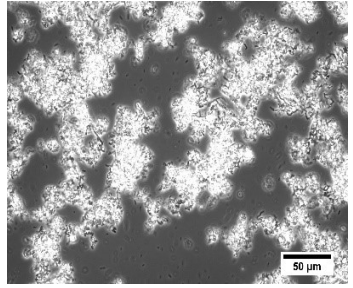

Canola heated

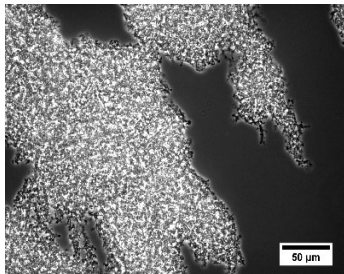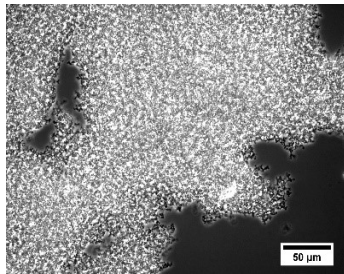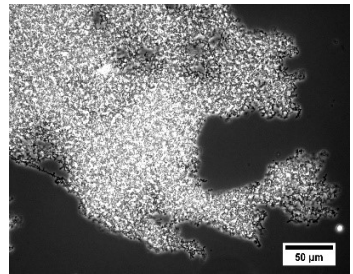

Sws

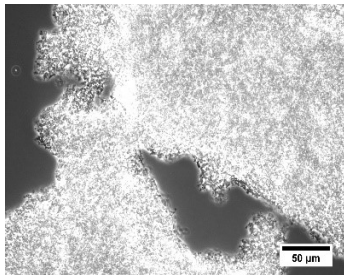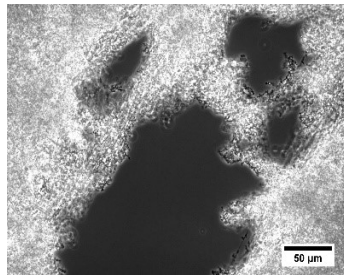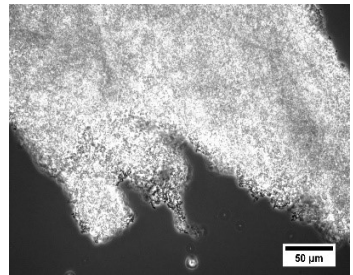

Ws

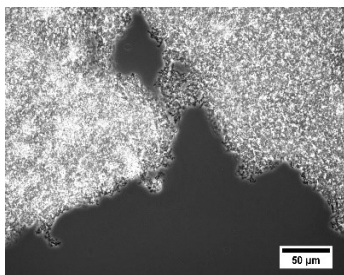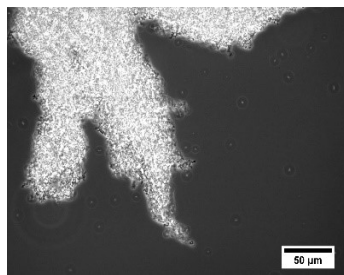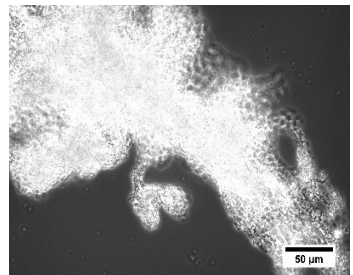

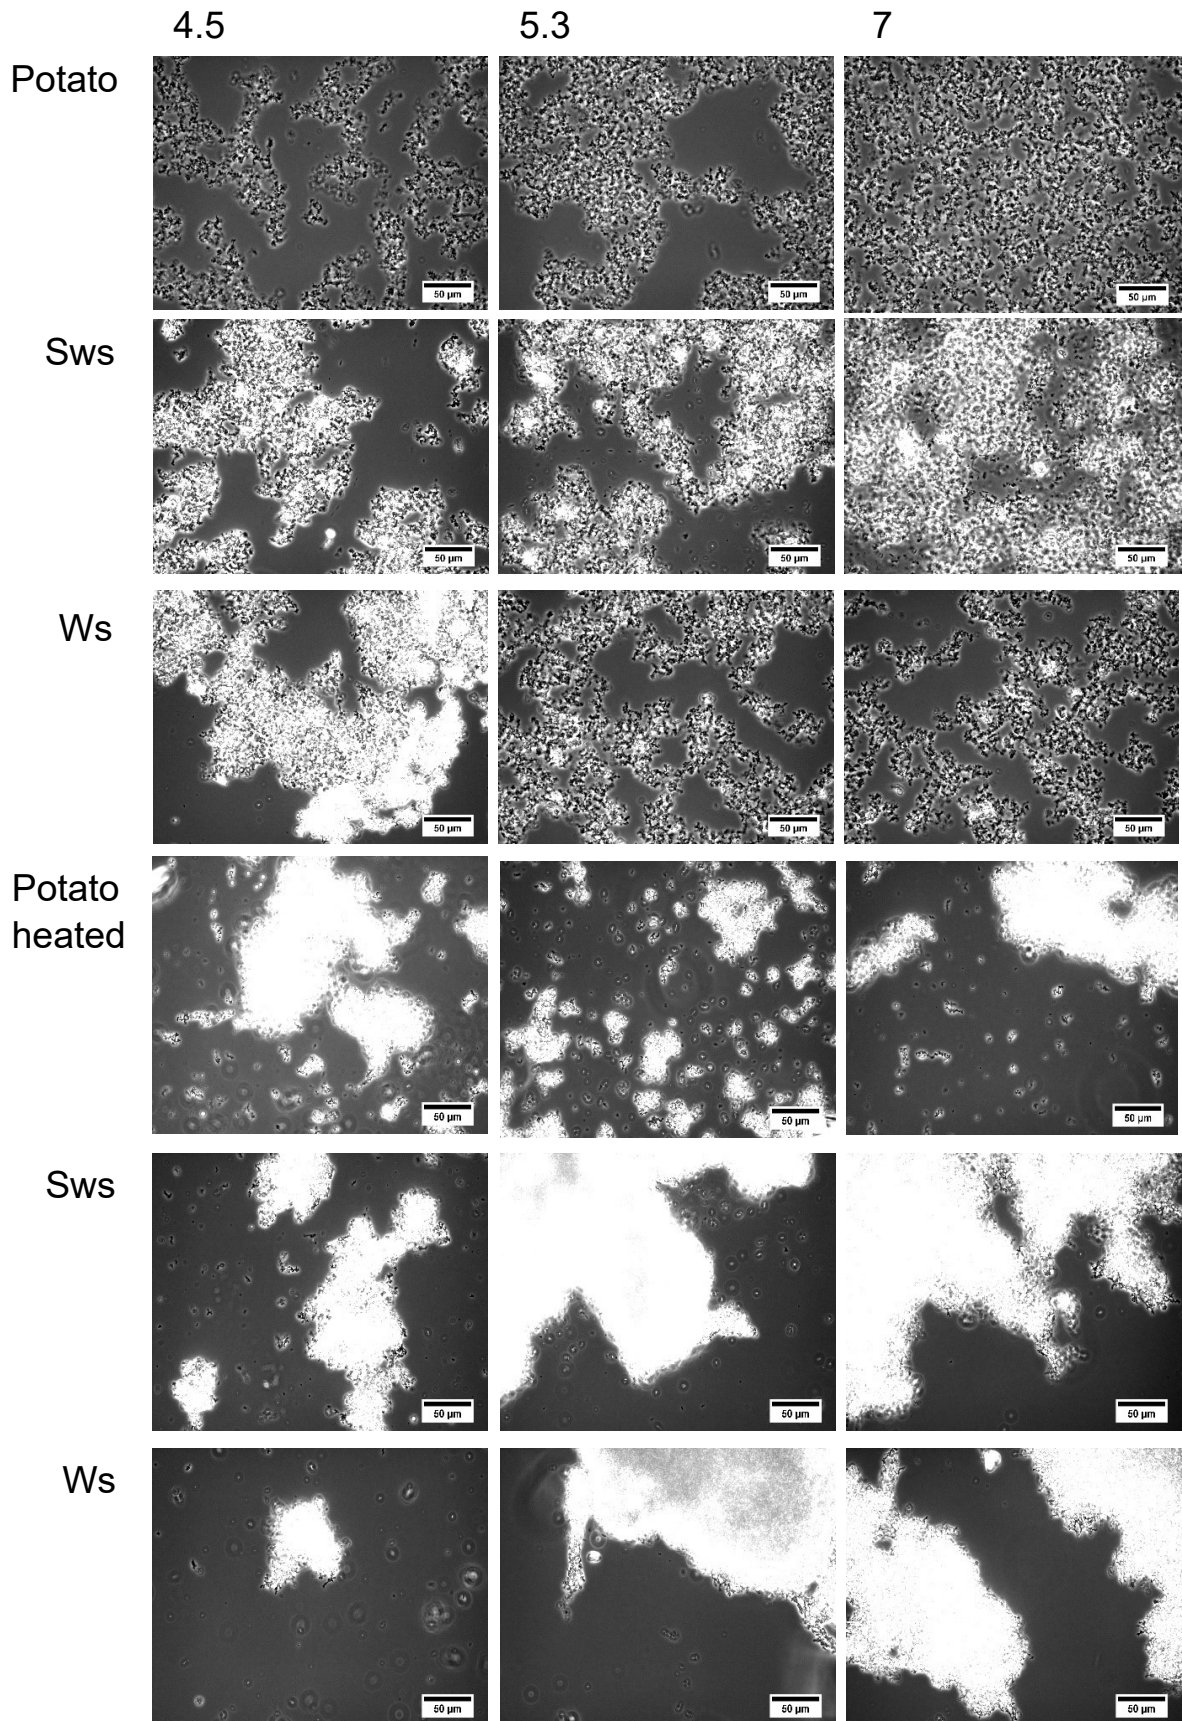

**Figure S1.** Microscopic images of meat (sws and ws), plant proteins (wheat, potato, sunflower, canola) and their protein mixtures at different pH values in unheated and heated systems.

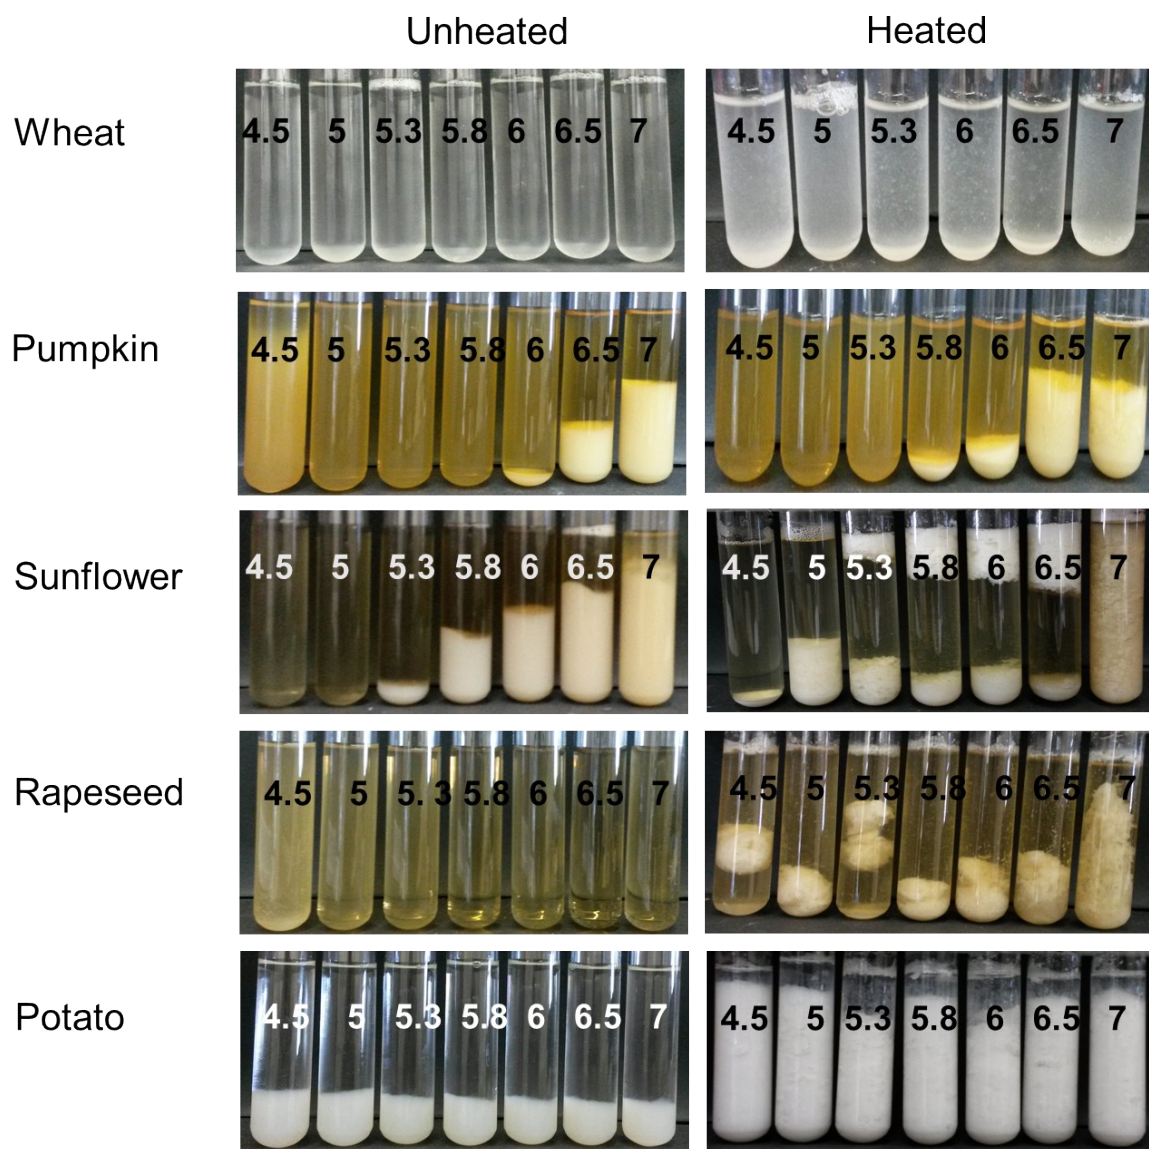

**Figure S2.** Images of unheated and heated pure plant protein solutions (1 wt% protein) at varying pH values, all containing 1.8 wt% salt, stored overnight at 4 °C for 10 min at 95 °C. (No gel formation)
